# Supplementary material for: Single-ion chelation strategy for synthesis of monodisperse Pd nanoparticles anchored in MOF-808 for highly efficient hydrogenation and cascade reactions
Source: Royal Society of Chemistry journal article supplement (doi:10.1039/d2nr02765h), 2022-01-01
Supplement: d2nr02765h1.pdf [file d2nr02765h1.pdf]

## Electronic Supporting Information

### **Single-Ion Chelation Strategy Synthesis of Monodisperse Pd Nanoparticles Anchored MOF-808 for Highly Efficient Hydrogenation and Cascade Reactions**

Ke Zhao <sup>1,2</sup>, Le-Xi Zhang <sup>1\*</sup>, Heng Xu <sup>1</sup>, Yi-Fei Liu <sup>1</sup>, Bo Tang <sup>1</sup>, Li-Jian Bie <sup>1\*</sup>

<sup>1</sup> School of Materials Science and Engineering, Tianjin Key Lab for Photoelectric Materials and Devices, Key Laboratory of Display Materials and Photoelectric Devices (Ministry of Education), National Demonstration Center for Experimental Function Materials Education, Tianjin University of Technology, Tianjin 300384, China.

<sup>2</sup> MOE Key Laboratory of Cluster Science, Beijing Key Laboratory of Photoelectronic/Electrophotonic Conversion Materials, School of Chemistry and Chemical Engineering, Beijing Institute of Technology, Beijing 102488, China.

\* Corresponding authors:

Le-Xi Zhang, Tel./Fax: +86 022 60214028. E-mail: lxzhang@tjut.edu.cn

Li-Jian Bie, Tel./Fax: +86 022 60215505.

E-mail: ljbie@tjut.edu.cn; ljbie@pku.org.cn

## **Contents**

**Section S1.** Materials characterization.....Page: S3 - S14

**Section S2.** Density functional theory (DFT) calculations.....Page: S15 – S18

**Section S3.** Catalytic performance.....Page: S19-S22

## Section S1. Materials characterization.

### Section S1.1 Powder X-ray diffraction (PXRD).

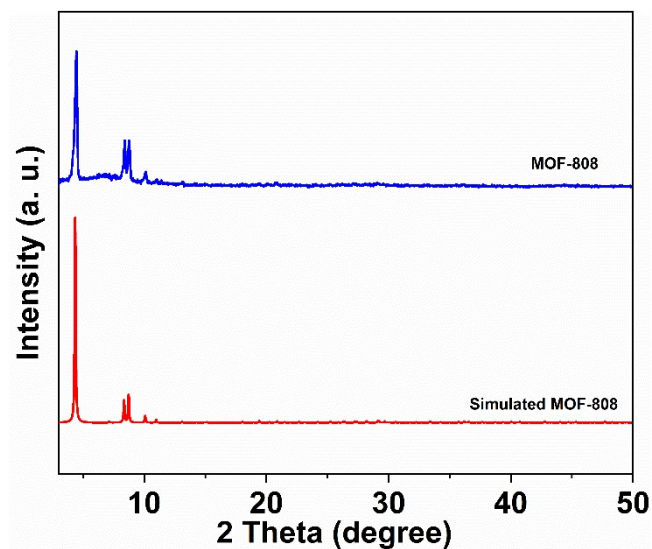

**Figure S1.** PXRD patterns of as-prepared MOF-808 and simulated patterns of MOF-808.

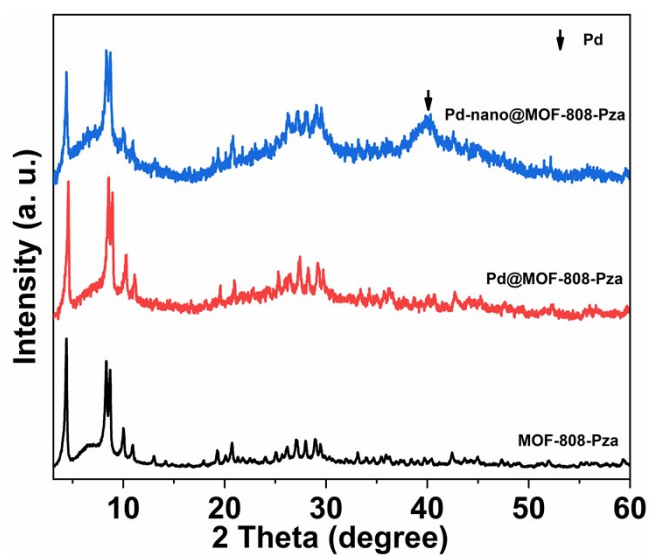

**Figure S2.** PXRD patterns of MOF-808-Pza, Pd@MOF-808-Pza, and Pd-nano@MOF-808-Pza, respectively.

Section S1.2 Nitrogen adsorption measurements.

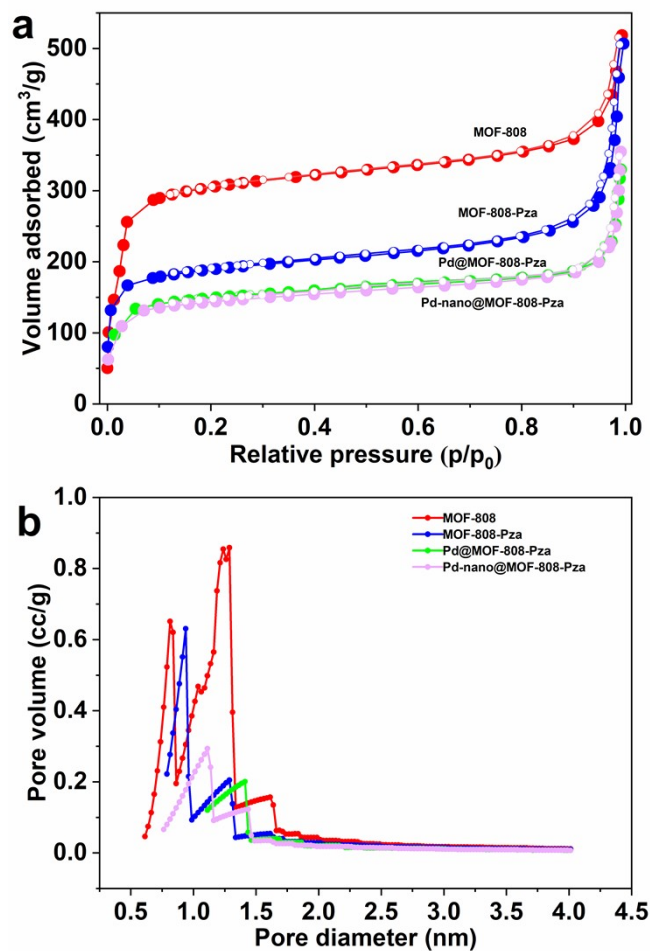

**Figure S3.** Nitrogen adsorption isotherms of MOF-808, MOF-808-Pza, Pd@MOF-808-Pza, and Pd-nano@MOF-808-Pza (a), as well as their calculated pore size distribution (b).

**Section S1.3** Thermal gravimetric analysis (TGA).

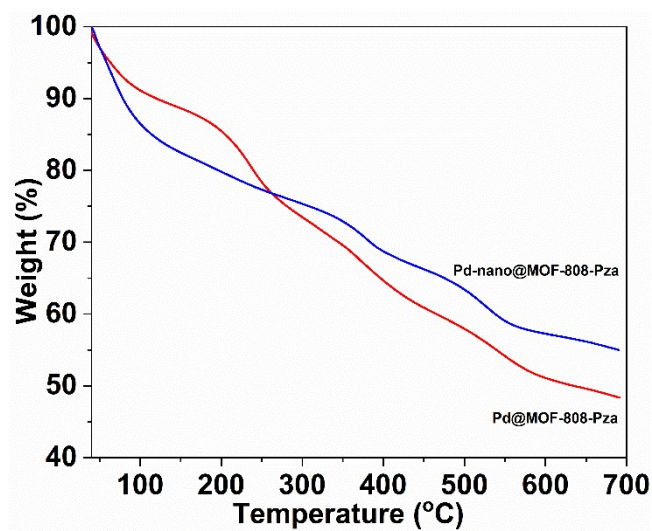

**Figure S4.** TGA plots of Pd@MOF-808-Pza and Pd-nano@MOF-808-Pza, respectively.

**Section S1.4** UV-Vis Diffuse Reflectance Spectroscopy (UV-Vis DRS).

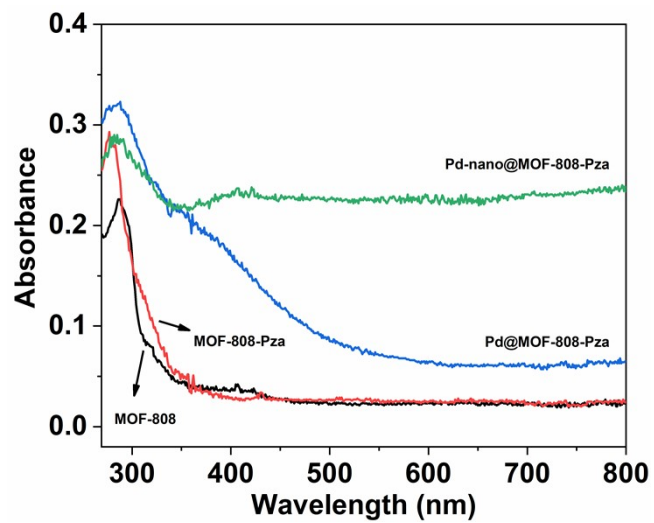

**Figure S5.** UV-Vis DRS spectra of MOF-808, MOF-808-Pza, Pd@MOF-808-Pza, and Pd-nano@MOF-808-Pza, respectively.

Section S1.5 Optical photos.

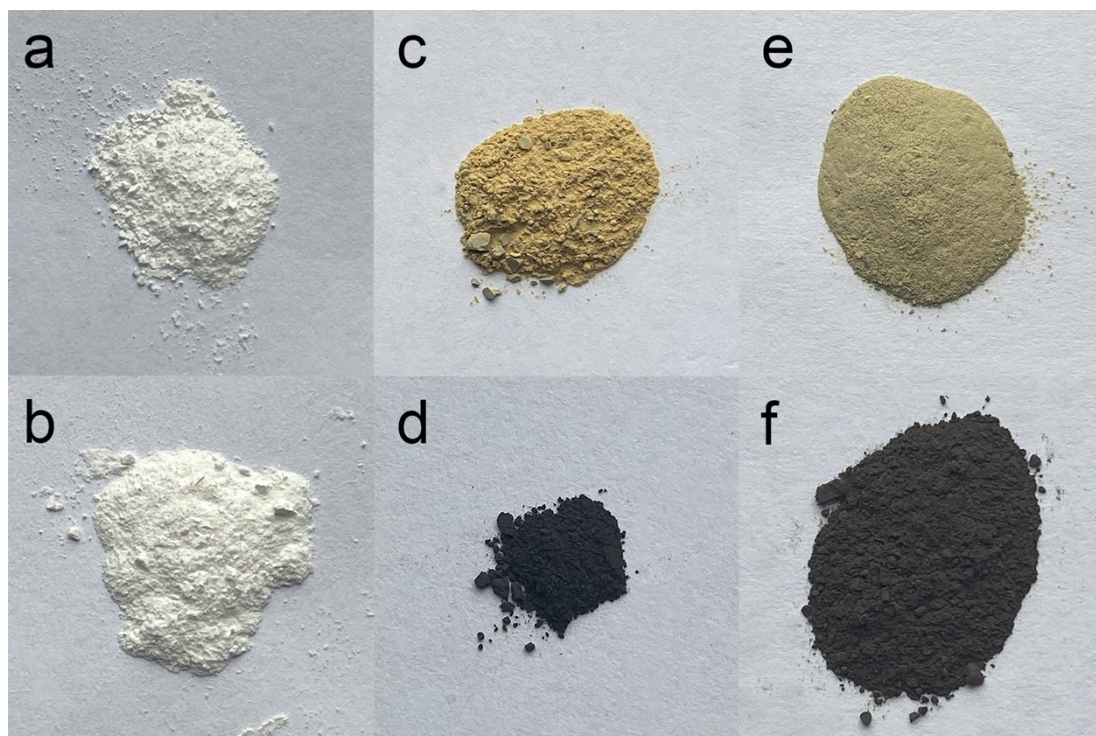

**Figure S6.** Graphs of bulk samples of (a) MOF-808, (b) MOF-808-Pza, (c) Pd@MOF-808-Pza, (d) Pd-nano@MOF-808-Pza, (e) Pd@MOF-808, and (f) Pd-nano@MOF-808, respectively.

Section S1.6 X-ray photoelectron spectroscopy (XPS).

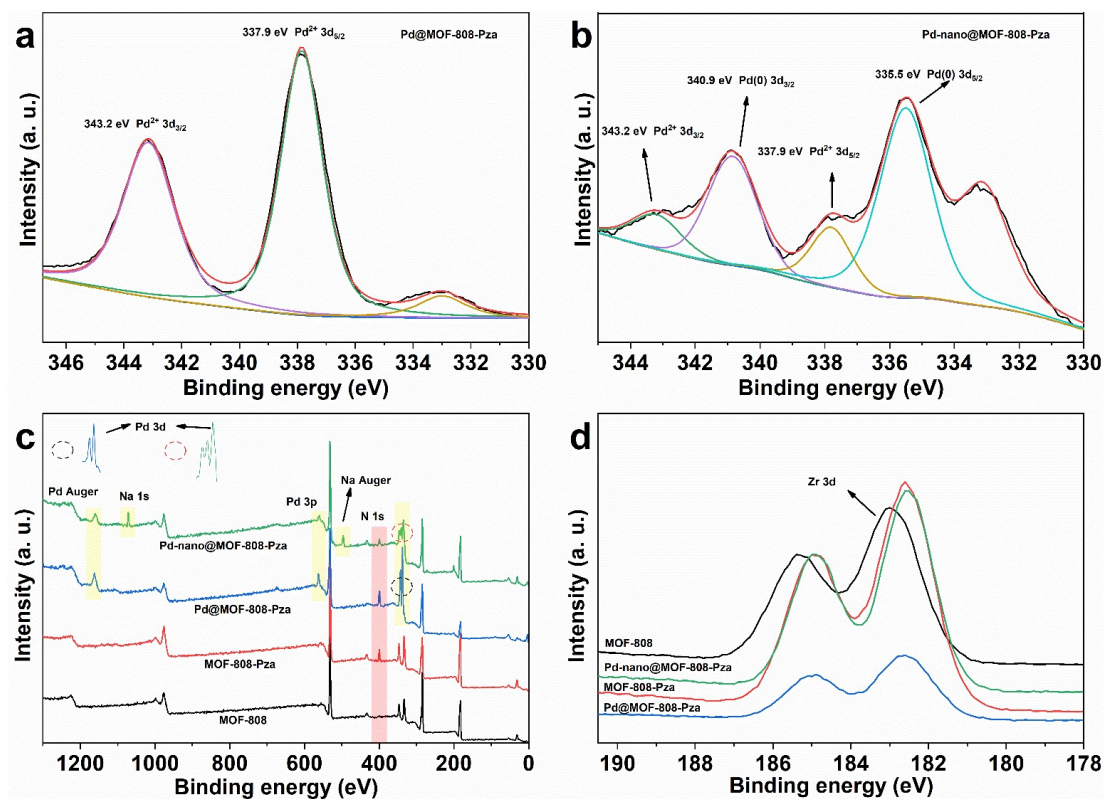

**Figure S7.** Pd 3d XPS spectra of Pd@MOF-808-Pza (a) and Pd-nano@MOF-808-Pza (b). Wide-scan (c) and Zr 3d (d) XPS spectra of MOF-808, MOF-808-Pza, Pd@MOF-808-Pza, and Pd-nano@MOF-808-Pza, respectively.



Section S1.7 Nuclear magnetic resonance spectroscopy ( $^1\text{H}$  NMR).

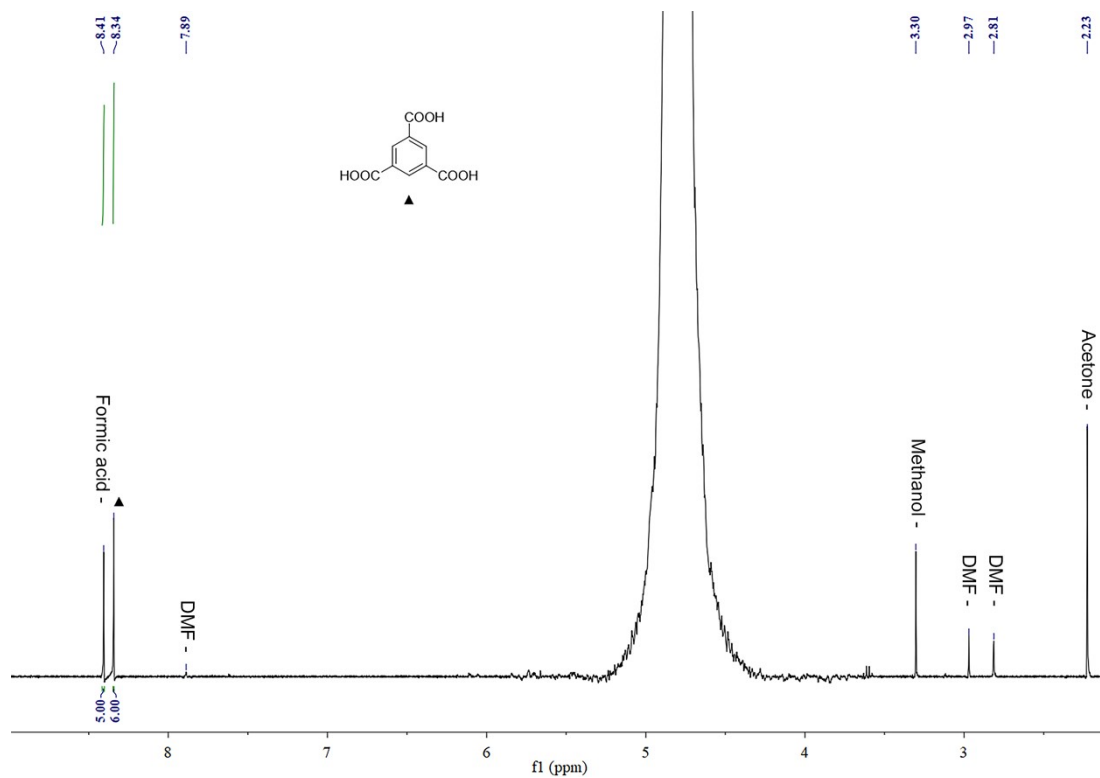

**Figure S8.**  $^1\text{H}$  NMR spectrum of MOF-808 obtained using  $\text{D}_2\text{O}$  as solvent after alkali ( $\text{NaOH}$ ) dissolution.

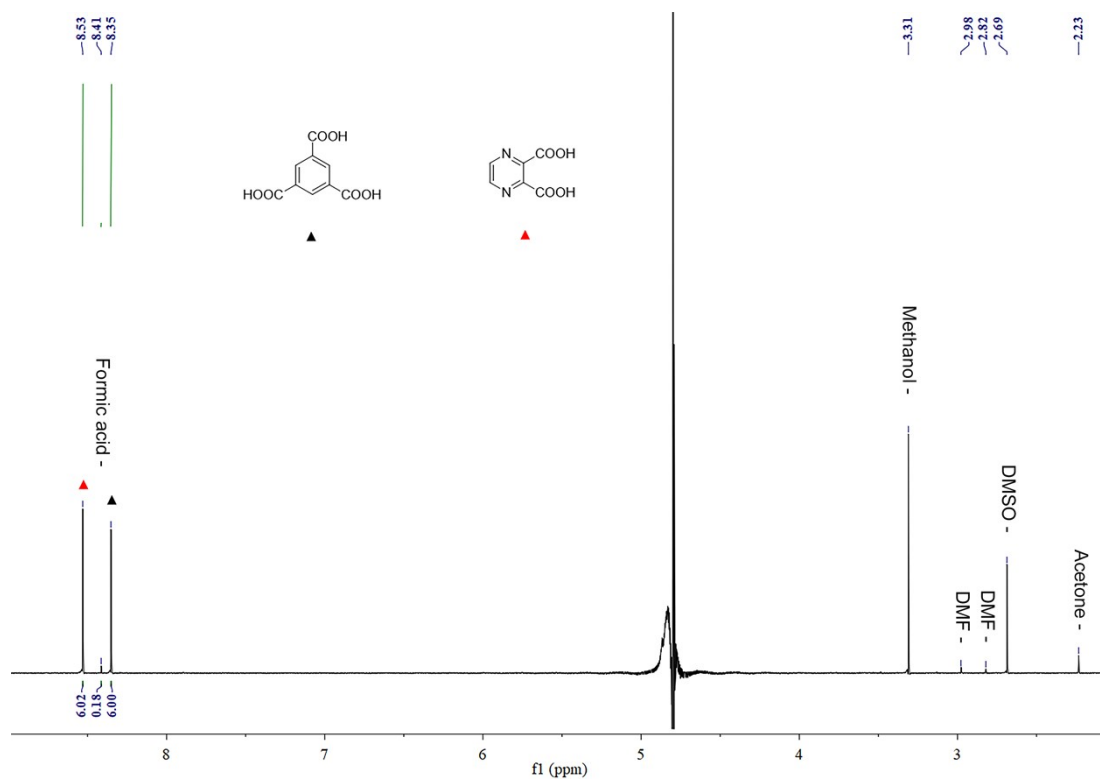

**Figure S9.**  $^1\text{H}$  NMR spectrum of MOF-808-Pza obtained using  $\text{D}_2\text{O}$  as solvent after alkali (NaOH) dissolution.

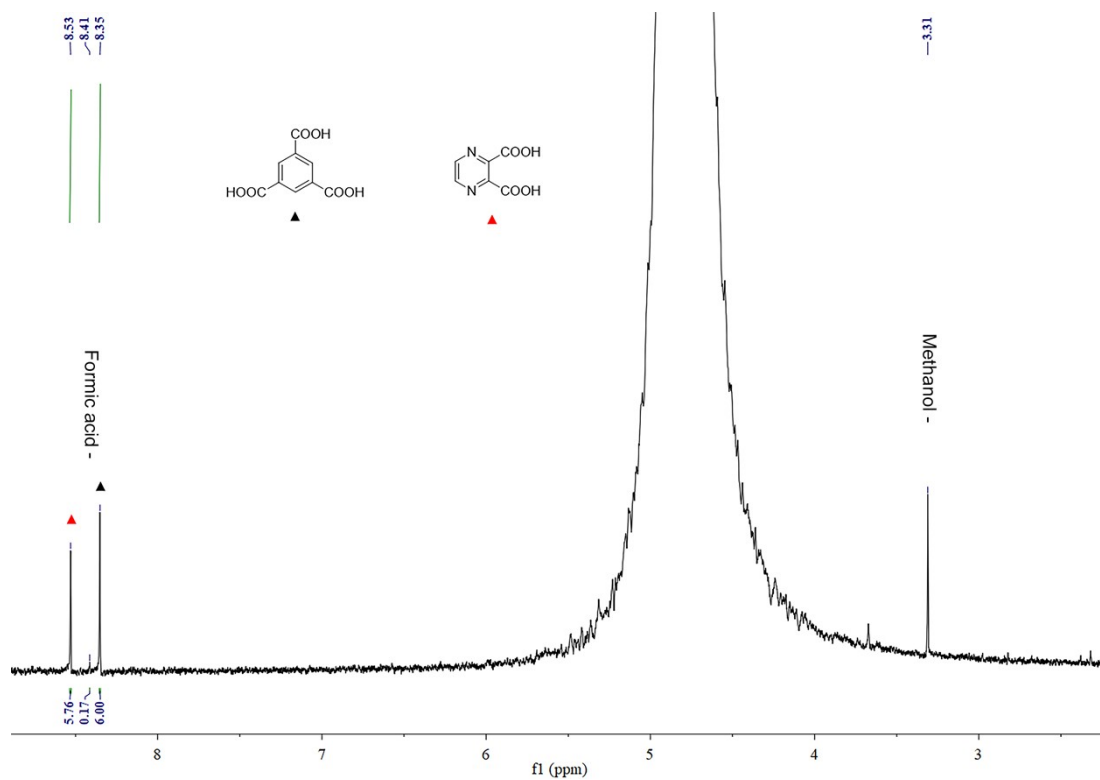

**Figure S10.**  $^1\text{H}$  NMR spectrum of Pd@MOF-808-Pza obtained using  $\text{D}_2\text{O}$  as solvent after alkali (NaOH) dissolution.

Section S1.8 FT-IR spectrum.

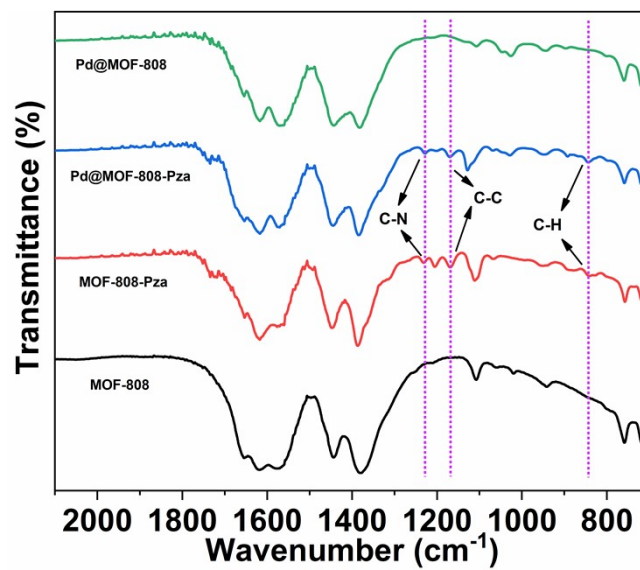

**Figure S11.** FT-IR spectra of MOF-808, MOF-808-Pza, Pd@MOF-808-Pza, and Pd@MOF-808, respectively.

Section S1.9 Energy dispersive spectroscopy (EDS).

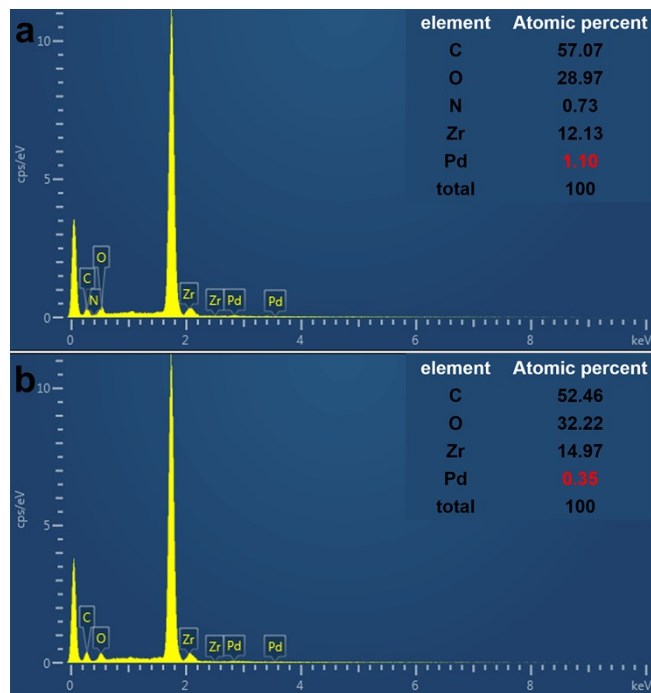

**Figure S12.** Element content distribution in EDS of Pd-nano@MOF-808-Pza (a) and Pd-nano@MOF-808 (b), respectively.

**Section S1.10** Inductively coupled plasma mass spectrometry (ICP-MS).

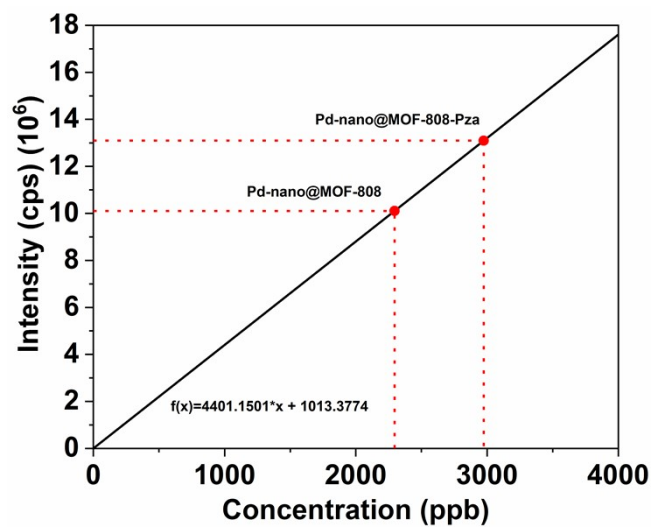

**Figure S13.** The content of Pd element in Pd-nano@MOF-808-Pza and Pd-nano@MOF-808 measured by ICP-MS was determined by standard Pd<sup>2+</sup> ion concentration curve.

## Section S2. DFT calculations.

**Table S1.** Changes of total energy of Zr<sub>6</sub> atom clusters before and after optimization.

| Model          | Initial VASP energy (eV) | Relaxation energy (eV) | VASP energy (eV) |
|----------------|--------------------------|------------------------|------------------|
| Pd@MOF-808-Pza | -467.64                  | -4.51                  | -472.15          |
| MOF-808-Pza    | -467.40                  | -0.31                  | -467.71          |
| Pd             | -                        | -                      | -1.47            |
| Pd@MOF-808     | -388.91                  | -1.91                  | -390.82          |
| MOF-808        | -                        | -                      | -386.38          |

**Table S2.** Structural parameters of Zr<sub>6</sub> cluster after optimization.

| Model          |                      | Bond Lengths<br>(Å) |                    | Bond<br>Angles (°) |
|----------------|----------------------|---------------------|--------------------|--------------------|
| Pd@MOF-808-Pza | C(1) - C(2)          | 1.53                | C(1) - C(2) - C(5) | 128.93             |
|                | C(2) - N(1)          | 1.34                | C(1) - C(2) - N(1) | 110.17             |
|                | N(1) - C(3)          | 1.33                | N(1) - C(3) - C(4) | 122.71             |
|                | C(3) - C(4)          | 1.39                | C(3) - C(4) - N(2) | 118.78             |
|                | C(4) - N(2)          | 1.34                | C(4) - N(2) - C(5) | 119.90             |
|                | N(2) - C(5)          | 1.36                | N(2) - C(5) - C(2) | 119.51             |
|                | C(5) - C(6)          | 1.51                | N(2) - C(5) - C(6) | 115.95             |
|                | C(6) - O(1)          | 1.23                | C(5) - C(6) - O(1) | 120.80             |
|                | C(6) - O(2)          | 1.31                | C(5) - C(6) - O(2) | 115.25             |
|                | O(2) - Pd            | 2.06                | C(6) - O(2) - Pd   | 114.56             |
|                | Pd - N(2)            | 2.04                | O(2) - Pd - N(2)   | 81.24              |
|                |                      |                     | Pd - N(2) - C(5)   | 112.98             |
|                |                      |                     | Pd - N(2) - C(4)   | 127.11             |
| Pd@MOF-808     | C - Pd<br>(distance) | 1.91                |                    |                    |



**Table S3.** Pd@MOF-808-Pza XYZ coordinates for DFT structures.

| Atom | X      | Y      | Z      | Atom | X      | Y      | Z      |
|------|--------|--------|--------|------|--------|--------|--------|
| N1   | 0.7569 | 0.6769 | 0.5325 | C11  | 0.4599 | 0.3426 | 0.5171 |
| N2   | 0.6445 | 0.6365 | 0.4561 | C12  | 0.2382 | 0.6216 | 0.4583 |
| C1   | 0.7441 | 0.6915 | 0.4508 | C14  | 0.3278 | 0.7066 | 0.6782 |
| C2   | 0.6879 | 0.6690 | 0.4129 | C17  | 0.4347 | 0.6876 | 0.4412 |
| C3   | 0.7145 | 0.6425 | 0.5776 | O27  | 0.3769 | 0.5850 | 0.7253 |
| C4   | 0.6565 | 0.6241 | 0.5389 | O28  | 0.2937 | 0.5060 | 0.5212 |
| H1   | 0.7780 | 0.7205 | 0.4161 | O29  | 0.4762 | 0.5673 | 0.5052 |
| H2   | 0.6777 | 0.6778 | 0.3456 | O30  | 0.3114 | 0.4819 | 0.6900 |
| C5   | 0.7344 | 0.6266 | 0.6680 | O31  | 0.4939 | 0.5432 | 0.6741 |
| O1   | 0.7905 | 0.6483 | 0.6924 | O34  | 0.4107 | 0.4642 | 0.4699 |
| O2   | 0.6995 | 0.5953 | 0.7137 | O35  | 0.4641 | 0.5593 | 0.8371 |
| Zr1  | 0.4126 | 0.4951 | 0.7485 | O38  | 0.2331 | 0.4177 | 0.5920 |
| Zr4  | 0.3404 | 0.4265 | 0.5711 | O40  | 0.5310 | 0.4824 | 0.4195 |
| Zr6  | 0.4990 | 0.4797 | 0.5573 | O41  | 0.1990 | 0.5121 | 0.6343 |
| Zr7  | 0.2887 | 0.5695 | 0.6380 | O43  | 0.4856 | 0.6437 | 0.7558 |
| Zr9  | 0.4473 | 0.6227 | 0.6242 | O46  | 0.4502 | 0.5324 | 0.3471 |
| Zr12 | 0.3750 | 0.5541 | 0.4468 | O53  | 0.3236 | 0.4899 | 0.3581 |
| O3   | 0.5034 | 0.4476 | 0.7814 | O54  | 0.5544 | 0.6315 | 0.6032 |
| O6   | 0.3320 | 0.3615 | 0.6783 | O55  | 0.2566 | 0.5669 | 0.7758 |
| O8   | 0.5019 | 0.3836 | 0.5187 | O56  | 0.5887 | 0.5371 | 0.5611 |
| O9   | 0.2288 | 0.6115 | 0.5368 | O57  | 0.3020 | 0.4055 | 0.4395 |
| O11  | 0.3876 | 0.6998 | 0.6676 | O58  | 0.3375 | 0.5168 | 0.8482 |
| O14  | 0.4092 | 0.6436 | 0.4030 | C24  | 0.4867 | 0.6129 | 0.8258 |
| O21  | 0.2843 | 0.6017 | 0.4139 | C27  | 0.1898 | 0.4561 | 0.6154 |
| O22  | 0.4556 | 0.6877 | 0.5170 | C29  | 0.5049 | 0.5048 | 0.3516 |
| O23  | 0.2857 | 0.6656 | 0.6765 | C33  | 0.3008 | 0.4363 | 0.3694 |
| O24  | 0.5588 | 0.4377 | 0.6585 | C34  | 0.5978 | 0.5931 | 0.5798 |
| O25  | 0.4000 | 0.3494 | 0.5277 | C35  | 0.2828 | 0.5444 | 0.8437 |
| O26  | 0.3784 | 0.4056 | 0.7923 | O59  | 0.4330 | 0.4287 | 0.6443 |
| C6   | 0.5494 | 0.4277 | 0.7369 | O61  | 0.3546 | 0.6205 | 0.5509 |
| C9   | 0.3529 | 0.3617 | 0.7541 | Pd1  | 0.8370 | 0.6995 | 0.6013 |

**Table S4.** Pd@MOF-808 XYZ coordinates for DFT structures.

| Atom | X      | Y      | Z      | Atom | X      | Y      | Z      |
|------|--------|--------|--------|------|--------|--------|--------|
| Zr1  | 0.4126 | 0.4951 | 0.7485 | O29  | 0.4762 | 0.5673 | 0.5052 |
| Zr4  | 0.3404 | 0.4265 | 0.5711 | O30  | 0.3114 | 0.4819 | 0.6900 |
| Zr6  | 0.4990 | 0.4797 | 0.5573 | O31  | 0.4939 | 0.5432 | 0.6741 |
| Zr7  | 0.2887 | 0.5695 | 0.6380 | O34  | 0.4107 | 0.4642 | 0.4699 |
| Zr9  | 0.4473 | 0.6227 | 0.6242 | O35  | 0.4641 | 0.5593 | 0.8371 |
| Zr12 | 0.3750 | 0.5541 | 0.4468 | O38  | 0.2331 | 0.4177 | 0.5920 |
| O3   | 0.5034 | 0.4476 | 0.7814 | O40  | 0.5310 | 0.4824 | 0.4195 |
| O6   | 0.3320 | 0.3615 | 0.6783 | O41  | 0.1990 | 0.5121 | 0.6343 |
| O8   | 0.5019 | 0.3836 | 0.5187 | O43  | 0.4856 | 0.6437 | 0.7558 |
| O9   | 0.2288 | 0.6115 | 0.5368 | O46  | 0.4502 | 0.5324 | 0.3471 |
| O11  | 0.3876 | 0.6998 | 0.6676 | O53  | 0.3236 | 0.4899 | 0.3581 |
| O14  | 0.4092 | 0.6436 | 0.4030 | O54  | 0.5544 | 0.6315 | 0.6032 |
| O21  | 0.2843 | 0.6017 | 0.4139 | O55  | 0.2566 | 0.5669 | 0.7758 |
| O22  | 0.4556 | 0.6877 | 0.5170 | O56  | 0.5887 | 0.5371 | 0.5611 |
| O23  | 0.2857 | 0.6656 | 0.6765 | O57  | 0.3020 | 0.4055 | 0.4395 |
| O24  | 0.5588 | 0.4377 | 0.6585 | O58  | 0.3375 | 0.5168 | 0.8482 |
| O25  | 0.4000 | 0.3494 | 0.5277 | C24  | 0.4867 | 0.6129 | 0.8258 |
| O26  | 0.3784 | 0.4056 | 0.7923 | C27  | 0.1898 | 0.4561 | 0.6154 |
| C6   | 0.5494 | 0.4277 | 0.7369 | C29  | 0.5049 | 0.5048 | 0.3516 |
| C9   | 0.3529 | 0.3617 | 0.7541 | C33  | 0.3008 | 0.4363 | 0.3694 |
| C11  | 0.4599 | 0.3426 | 0.5171 | C34  | 0.5978 | 0.5931 | 0.5798 |
| C12  | 0.2382 | 0.6216 | 0.4583 | C35  | 0.2828 | 0.5444 | 0.8437 |
| C14  | 0.3278 | 0.7066 | 0.6782 | O59  | 0.4330 | 0.4287 | 0.6443 |
| C17  | 0.4347 | 0.6876 | 0.4412 | O61  | 0.3546 | 0.6205 | 0.5509 |
| O27  | 0.3769 | 0.5850 | 0.7253 | Pd1  | 0.5260 | 0.6508 | 0.9223 |
| O28  | 0.2937 | 0.5060 | 0.5212 |      |        |        |        |

### Section S3. Catalytic performance.

**Table S5.** The reduction activity of Pd@MOF-808-Pza for nitrobenzene derivatives. <sup>a</sup>

| $\text{R-C}_6\text{H}_4\text{-NO}_2 \xrightarrow[\text{NaBH}_4, \text{Ethanol}, 25^\circ\text{C}]{\text{Pd@MOF-808-Pza}} \text{R-C}_6\text{H}_4\text{-NH}_2$ |                                                                                     |                                                                                     |           |                        |
|--------------------------------------------------------------------------------------------------------------------------------------------------------------|-------------------------------------------------------------------------------------|-------------------------------------------------------------------------------------|-----------|------------------------|
| Entry                                                                                                                                                        | Reactant                                                                            | Product                                                                             | Yield (%) | TOF (h <sup>-1</sup> ) |
| 1                                                                                                                                                            |    |    | > 99      | 215.83                 |
| 2                                                                                                                                                            |    |    | 92.54     | 199.73                 |
| 3                                                                                                                                                            |    |    | 59.95     | 129.39                 |
| 4                                                                                                                                                            |   |   | 0         | 0                      |
| 5                                                                                                                                                            |  |  | 0         | 0                      |
| 6                                                                                                                                                            |  |  | > 99      | 215.83                 |
| 7                                                                                                                                                            |  |  | > 99      | 215.83                 |
| 8                                                                                                                                                            |  |  | > 99      | 215.83                 |
| 9                                                                                                                                                            |  |  | > 99      | 215.83                 |
| 10                                                                                                                                                           |  |  | 86.75     | 187.23                 |
| 11                                                                                                                                                           |  |  | 89.53     | 193.23                 |

<sup>a</sup> Reaction conditions: 0.5 mmol reactant, 0.75 mmol NaBH<sub>4</sub>, 25 °C, 10 min, 10 mg Pd@MOF-808-Pza catalyst, 15 mL of ethanol.

**Table S6.** The catalytic activity of Pd@MOF-808-Pza for Knoevenagel condensation. <sup>a</sup>

| Entry | Reactant                                                                            | Product                                                                             | Yield (%)          | TOF (h <sup>-1</sup> ) |
|-------|-------------------------------------------------------------------------------------|-------------------------------------------------------------------------------------|--------------------|------------------------|
| 1     | 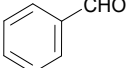   |    | 94.35              | 67.88                  |
| 2     |    |    | 51.37              | 36.96                  |
| 3     |    |    | 86.96              | 62.56                  |
| 4     |    |    | 93.90              | 67.55                  |
| 5     |    |    | 52.59              | 37.83                  |
| 6     |   |   | 86.46 <sup>b</sup> | 62.20                  |
| 7     |  |  | 82.23              | 59.16                  |
| 8     |  |  | 30.54              | 21.97                  |
| 9     |  |  | 58.94              | 42.40                  |
| 10    |  |  | 72.28              | 52.00                  |
| 11    |  |  | 64.90              | 46.69                  |
| 12    |  |  | 62.72              | 45.12                  |
| 13    |  |  | 78.44              | 56.43                  |

<sup>a</sup> Reaction conditions: 0.5 mmol reactant, 0.6 mmol malononitrile, 25 °C, 30 min, 10 mg Pd@MOF-808-Pza catalyst, 15 mL of ethanol. <sup>b</sup> The other 13.54% are amino products.

**Table S7.** The catalytic activity of Pd@MOF-808-Pza for Suzuki reaction. <sup>a</sup>

| Entry | Reactant                                                                            | Product                                                                             | Yield (%) | TOF (h <sup>-1</sup> ) |
|-------|-------------------------------------------------------------------------------------|-------------------------------------------------------------------------------------|-----------|------------------------|
| 1     | 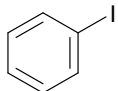   |    | > 99      | 8.99                   |
| 2     |    |    | 20.96     | 1.88                   |
| 3     |    |    | 32.15     | 2.89                   |
| 4     |    |    | > 99      | 8.99                   |
| 5     |    |    | > 99      | 8.99                   |
| 6     |  |  | 92.52     | 8.32                   |
| 7     |  |  | > 99      | 8.99                   |
| 8     |  |  | 78.37     | 7.05                   |

<sup>a</sup> Reaction conditions: 0.5 mmol reactant, 0.6 mmol phenylboronic acid, 80 °C, 10 mg Pd@MOF-808-Pza catalyst, 15 mL of DMF, anhydrous.

**Table S8.** The catalytic activity of Pd@MOF-808-Pza for Heck reaction. <sup>a</sup>

| Entry | Reactant                                                                            | Product                                                                              | Yield (%) <sup>b</sup> |
|-------|-------------------------------------------------------------------------------------|--------------------------------------------------------------------------------------|------------------------|
| 1     | 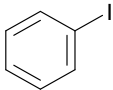   |    | 92.57                  |
| 2     |    |    | 33.41                  |
| 3     |    |    | 96.27                  |
| 4     |  |  | > 99                   |
| 5     |  |  | 75.12                  |

<sup>a</sup> Reaction conditions: 0.5 mmol reactant, 0.6 mmol styrene, 80 °C, 10 mg Pd@MOF-808-Pza catalyst, 15 mL of DMF, anhydrous; <sup>b</sup> Catalytic reaction products were analyzed and identified by GC-MS.
